# Supplementary material for: Crack initiation and propagation in sweet cherry skin: A simple chain reaction causes the crack to ‘run’
Source: PLoS One. 2019 Jul 31;14(7):e0219794. doi: 10.1371/journal.pone.0219794 (PMC6668808; doi:10.1371/journal.pone.0219794)
Supplement: S1 Dataset — (XLSX) [file pone.0219794.s001.xlsx]

## Sheet: Table 1
					Time (h)								Time (h)								Time (h)								Time (h)
Cultivar		Position	Replication	Crack-No.	8	22		Cultivar		Position	Replication	Crack-No.	8	22		Cultivar		Position	Replication	Crack-No.	8	22		Cultivar		Position	Replication	Crack-No.	8	22
Adriana		Suture	3	1		5.08		Early Korvic		Suture	1	1		5.02		Gill Peck		Cheek	1	1		3.57		Hedelfinger		Cheek	5	1		3.75
			6	1		4.66					4	1	5.85	6.07					1	2		15.12				Shoulder 2	1	1		2.35
		Shoulder 2	6	1		1.57				Shoulder 1	2	1		4.65				Suture	1	1		10.37					2	1		23.01
		Stylar scar	1	1		7.87					3	1		3.7					2	1		3.17				Stylar scar	1	1	12.63	17.37
			1	2		3.96					4	1		1.37					4	1		9.14					2	1	7.23	13.43
			2	1		7.58				Shoulder 2	1	1		3.66				Shoulder 1	2	1		1.84					2	2	5.62
			2	2		3.36					3	1		4.73					5	1		2.89					3	1	8.87	9.83
			2	3		1.45					6	1		2.1					5	2		3.9					3	2	11.35	14.23
			2	4		2.09				Stylar scar	1	1	5.84	6.76				Stylar scar	1	1	4.07	6.52					4	1		6.35
			2	5		3.68					1	2	12.34	15.6					1	2	12.44	13.83					4	2		3.91
			2	6		1.91					1	3		3.09					1	3		5.76					5	1		6.36
			2	7		5.16					2	1	8.25	11.98					2	1		4.67				Pedicel region	1	1	6.92	21.36
			3	1		6.93					2	2	6.02	5.86					2	2		5.01					3	1	14.33	17.61
			3	2		3.04					2	3	5.23	13.98					2	3		8.89					4	1		16.64
			3	3		7.61					2	4	8.58						3	1		5.17					4	2		18.26
			4	1		4.21					3	1	5.07	6.19					3	2		11.98					5	1		14.27
			4	2		2.87					3	2	3.42	3.1					4	1	9.47	16.63
			6	1		3.47					3	3	5.14	6.24					5	1	6.07	13.94
			6	2		0.75					4	1	5.53	5.18					6	1	3.17	17.8
			6	3		3.64					4	2	5.32	5.12				Pedicel region	2	1	9.11	10.27
			6	4		6.34					4	3	11.32	10.88					2	2	7.22	6.8
		Pedicel region	1	1		6.99					4	4		2.34					2	3	4.24	4.87
			1	2		20.87					4	5		2.28					3	1	13.24	28.5
			2	1		26.74					5	1	4.75	9.38					3	2	18.89
			2	2		30.78					5	2	4.69	12.81					4	1	5.34	11.98
			3	1		3.29					5	3	4.28						4	2	6.04	4.79
			3	2		25.56					5	4	7.22						4	3	9.48	7.78
			4	1		4.73					6	1	6.59	6.95					5	1	11.3	18.42
			4	2		26.6					6	2	3.46	7.69
			5	1		5.26					6	3	4.39	6.8
			5	2		5.45					6	4	5.03	2.03
										Pedicel region	1	1		3.56
											1	2		6.52
											2	1		10.08
											3	1		11.96
											4	1		6.88
											4	2		17.08

## Sheet: Table 2
Regina	44 h incubation						Kordia	8 h incubation						Adriana	16 h incubation						Sam	14 h incubation						Regina	16 h incubation						Sweetheart	12 h incubation
Ruthe, field							Ruthe, field							Ruthe, field							Ruthe, field							Ruthe, field							Ruthe, field
	cell wall no.	Zone III	Zone II	Zone I	Length zone II			cell wall no.	Zone III	Zone II	Zone I	Length zone II			cell wall no.	Zone III	Zone II	Zone I	Length zone II			cell wall no.	Zone III	Zone II	Zone I	Length zone II			cell wall no.	Zone III	Zone II	Zone I	Length zone II			cell wall no.	Zone III	Zone II	Zone I	Length zone II
		µm	µm	µm	µm				µm	µm	µm	µm				µm	µm	µm	µm				µm	µm	µm	µm				µm	µm	µm	µm				µm	µm	µm	µm
Cherry 1	1	9.79	6.8	5.84	223.26		Cherry 1	1	5.48	5.05	1.93	295.4		Cherry 1	1	5.11	2.58	2.82			Cherry 1	1	5.90897	2.97968	3.48748			Cherry 1	1	7.06	6.54	2.51			Cherry 1	1	4.21	4.85	2.15	181.71
Cherry 1	2	9.29	5.67	5			Cherry 1	2	6.59	4.01	2.06			Cherry 1	2	5.38	2.87	3.22			Cherry 1	2	6.64162	5.27448	3.60001			Cherry 1	2	6.88	5.56	3.16			Cherry 1	2	4.37	3.96	2.6
Cherry 1	3	8.41	5.97	4.72			Cherry 1	3	4.28	6.02	3.35			Cherry 1	3	5.5	2.57	3.05			Cherry 1	3	5.22758	3.66459	3.60001			Cherry 1	3	6.95	5.18	2.94			Cherry 1	3	4.6	3.24	2.68
Cherry 1	4	6.79	5.87	5.48			Cherry 1	4	5.6	3.26	2.17			Cherry 1	4	4.49	3.9	2.71			Cherry 1	4	6.34633	6.09654	4.32788			Cherry 1	4	6.8	7.47	2.46			Cherry 1	4	4.63	4.94	1.84
Cherry 2	1	8	7.34	2.12	503.15		Cherry 2	1	6.07	4.76	3.16	706		Cherry 2	1	4.46	3.25	2.91			Cherry 2	1	5.64816	2.68134	2.09159			Cherry 2	1	5.36	5.39	5.11			Cherry 2	1	2.68	2.47	3.49	605.83
Cherry 2	2	7.52	5.13	3.75			Cherry 2	2	7.03	5.32	2.17			Cherry 2	2	5.29	3.15	3.97			Cherry 2	2	2.40462	3.57221	3.49252			Cherry 2	2	7.23	3.49	3.9			Cherry 2	2	4.62	3.74	2.52
Cherry 2	3	8.78	5.42	2.08			Cherry 2	3	5.44	3.15	2.91			Cherry 2	3	3.51	3.49	2.18			Cherry 2	3	4.06949	2.61939	3.17039			Cherry 2	3	5.33	5.62	3.31			Cherry 2	3	5.97	3.47	2.06
Cherry 2	4	8.07	6.57	2.07			Cherry 2	4	9.63	3.92	2.88			Cherry 2	4	3.25	3.9	2.96			Cherry 2	4	3.66459	4.04637	3.17039			Cherry 2	4	5.7	4.66	3.39			Cherry 2	4	7.97	4.93	1.73
Cherry 3	1	8.87	7.36	5.66	334.79		Cherry 3	1	4.9	3.37	1.26	188.74		Cherry 3	1	2.42	2.23	1.99			Cherry 3	1	4.73055	2.94205	3.04008			Cherry 3	1	7.3	8.31	5.32			Cherry 3	1	5.96	3.97	2.18	360.15
Cherry 3	2	7.42	4.69	5.49			Cherry 3	2	4.48	2.89	1.89			Cherry 3	2	2.78	2.77	2.3			Cherry 3	2	4.80679	3.10309	4.46			Cherry 3	2	15.46	3.77	3.91			Cherry 3	2	4.01	4.81	2.13
Cherry 3	3	6.1	6.03	6.22			Cherry 3	3	3.59	2.74	2.25			Cherry 3	3	4.31	2.34	2.38			Cherry 3	3	4.55369	3.73434	3.04971			Cherry 3	3	6.98	6.25	3.39			Cherry 3	3	5.96	3.75	2.04
Cherry 3	4	7.42	4.95	5.66			Cherry 3	4	1.91	2.5	2.13			Cherry 3	4	4.03	2.28	3.42			Cherry 3	4	5.49021	4.70195	3.15742			Cherry 3	4	5.86	4.44	5.76			Cherry 3	4	5.12	4.72	2.79
Cherry 4	1	10.67	8.25	2.62	477.02		Cherry 4	1	4.55	3.36	2.77	288.94		Cherry 4	1	2.91	2.34	1.68			Cherry 4	1	5.75512	4.72186	4.33735			Cherry 4	1	7.9	6.09	4.52			Cherry 4	1	4.85	3.14	1.8	314.15
Cherry 4	2	9.42	6.37	1.53			Cherry 4	2	4.83	6.2	3.02			Cherry 4	2	3.01	2.46	1.96			Cherry 4	2	9.19071	4.74664	4.38174			Cherry 4	2	8.8	6.36	5.83			Cherry 4	2	4.87	3.09	1.47
Cherry 4	3	7.93	6.24	1.88			Cherry 4	3	5.36	4.05	2.69			Cherry 4	3	2.26	2.54	3.19			Cherry 4	3	6.75456	3.15742	5.47309			Cherry 4	3	6.48	6.2	6.05			Cherry 4	3	4.28	3.29	2.84
Cherry 4	4	7.6	5.57	2.45			Cherry 4	4	4.24	5.38	2.75			Cherry 4	4	2.57	2.39	2.62			Cherry 4	4	6.91077	6.37859	5.37689			Cherry 4	4	10.52	5.6	6.02			Cherry 4	4	6.32	4.49	1.91
Cherry 5	1	11.87	7.24	4.03	138.73		Cherry 5	1	6.8	6.94	2.13	97.29		Cherry 5	1	3.86	2.25	2.47			Cherry 5	1	5.08542	4.00704	3.25076			Cherry 5	1	6.28	4.46	3.91			Cherry 5	1	6.22	4.7	3.41	170.13
Cherry 5	2	9.12	7.98	4.33			Cherry 5	2	4.85	6.27	2.33			Cherry 5	2	3.19	2.3	3.02			Cherry 5	2	5.52216	5.20734	4.11677			Cherry 5	2	9.73	3.26	2.93			Cherry 5	2	6.56	4.59	3.46
Cherry 5	3	7.65	5.77	4.24			Cherry 5	3	8.38	6.22	2.37			Cherry 5	3	3.34	3.49	3.14			Cherry 5	3	6.41526	5.56658	4.31295			Cherry 5	3	7.5	4.09	3.34			Cherry 5	3	5.32	5.4	2.49
Cherry 5	4	7.15	7.34	4.62			Cherry 5	4	4.64	4.22	2.03			Cherry 5	4	2.92	3.92	3.04			Cherry 5	4	7.47965		5.33308			Cherry 5	4	6.89	3.79	3.36			Cherry 5	4	4.96	5.66	2.63
Cherry 6	1	6.69	6.2	3.9	154.89		Cherry 6	1	10.14	4.7	5.09	195.75		Cherry 6	1	6.63	3.74	3.19			Cherry 6	1	10.6303	9.12738	6.22851			Cherry 6	1	5.96	6.28	4.27			Cherry 6	1	8.81	6.54	3.76	202.81
Cherry 6	2	4.67	4.15	3.07			Cherry 6	2	5.68	5.81	5.26			Cherry 6	2	4.23	3.59	2.64			Cherry 6	2	5.5156	7.21132	6.27426			Cherry 6	2	8.65	5.23	3.6			Cherry 6	2	7.81	4.84	4.27
Cherry 6	3	6.43	6.88	3.66			Cherry 6	3	7.21	7.25	5.7			Cherry 6	3	5.18	2.71	2.3			Cherry 6	3	10.2708	6.09559	6.20551			Cherry 6	3	5.67	6.24	5.14			Cherry 6	3	5.91	3.9	2.43
Cherry 6	4	4.93	7.35	4.63			Cherry 6	4	7.22	9.65	6.69			Cherry 6	4	3.66	3.3	2.67			Cherry 6	4	9.1288	13.8684	5.28201			Cherry 6	4	7.37	4.87	4.55			Cherry 6	4	6.86	5.86	2.99
Cherry 7	1	9.15	5.34	7.2	240.64		Cherry 7	1	6.02	3.1	1.98	291.5		Cherry 7	1	4.15	2.67	3.03			Cherry 7	1	4.26784	4.18038	3.75469			Cherry 7	1	5.69	7.07	4.44			Cherry 7	1	6.39	4.23	4.73	224.99
Cherry 7	2	8.92	7.54	4.76			Cherry 7	2	7.48	4.36	2.06			Cherry 7	2	2.81	3.29	3.63			Cherry 7	2	4.52527	4.76636	3.79045			Cherry 7	2	7.66	5.28	4.22			Cherry 7	2	8.21	5.57	3.56
Cherry 7	3	7.83	5.82	5.71			Cherry 7	3	3.98	6.04	4.42			Cherry 7	3	1.92	3.25	3.55			Cherry 7	3	4.9605	6.18819	3.30088			Cherry 7	3	14.17	5.72	3.19			Cherry 7	3	4.74	6.61	4.03
Cherry 7	4	10.95	6.27	5.67			Cherry 7	4	5.44	4.87	2.2			Cherry 7	4	2.92	3.54	3.06			Cherry 7	4	5.16324	3.60001	3.68215			Cherry 7	4	7.81	11.98	6.04			Cherry 7	4	6.14	5.49	3.23
Cherry 8	1	6.5	5.24	5.38	329.65		Cherry 8	1	5.19	4.9	2.53	192.42		Cherry 8	1	3.42	2.4	3.15			Cherry 8	1	6.16636	3.68374	2.65497			Cherry 8	1	9.18	6.78	2.54			Cherry 8	1	5.01	3.47	2.11	182.12
Cherry 8	2	5.46	6.1	4.47			Cherry 8	2	5.28	6.54	3.16			Cherry 8	2	3.1	2.82	2.73			Cherry 8	2	6.28691	4.37102	3.37294			Cherry 8	2	5.88	7.78	5.2			Cherry 8	2	5.03	2.28	2.12
Cherry 8	3	9.27	5.34	4.44			Cherry 8	3	7.9	3.51	3.6			Cherry 8	3	3.37	2.82	2.42			Cherry 8	3	5.18251	3.32213	3.97619			Cherry 8	3	5.61	6.26	3.44			Cherry 8	3	5.96	2.58	2.34
Cherry 8	4	8.82	6.5	6.67			Cherry 8	4	4.21	4.44	3.5			Cherry 8	4	2.81	2.32	3.15			Cherry 8	4	8.68078	3.4247	4.09391			Cherry 8	4	5	6.2	2.23			Cherry 8	4	5.12	2.56	2.01
Cherry 9	1	7.15	5.21	2.77	91.91		Cherry 9	1	4.63	4.85	2.13	527.14		Cherry 9	1	3.47	2.64	3.05			Cherry 9	1	4.9782	3.18515	2.60817			Cherry 9	1	5.42	4.28	4.13			Cherry 9	1	7.44	5.85	1.96	315.57
Cherry 9	2	8.28	5.03	2.55			Cherry 9	2	3.9	3.97	3.39			Cherry 9	2	4.89	3.1	3.44			Cherry 9	2	5.77648	3.24895	3.44178			Cherry 9	2	5.72	4.22	3.29			Cherry 9	2	13.23	4.48	2.42
Cherry 9	3	6.5	9.16	3.82			Cherry 9	3	3.76	2.45	1.71			Cherry 9	3	3.63	2.5	2.3			Cherry 9	3	4.59599	3.49588	3.73434			Cherry 9	3	8.79	5.59	4.07			Cherry 9	3	7.14	5.62	2.01
Cherry 9	4	5.95	9.11	2.94			Cherry 9	4	4.21	5.41	1.9			Cherry 9	4	3.05	1.44	1.93			Cherry 9	4	5.49021	4.07812	3.76717			Cherry 9	4	6.5	4.57	4.23			Cherry 9	4	7.13	8.66	2.58
Cherry 10	1	9.22	5.58	6.53	385.61		Cherry 10	1	5.15	6.74	3	490.22		Cherry 10	1	4.02	3.83	2.86			Cherry 10	1	6.2598	4.54596	4.34411			Cherry 10	1	7	6.33	4.15			Cherry 10	1	5.33	4.27	3.57	639.28
Cherry 10	2	8.57	5.98	5.55			Cherry 10	2	6.42	2.35	1.98			Cherry 10	2	3.36	3.64	3.37			Cherry 10	2	7.61639	7.64713	2.09159			Cherry 10	2	13.34	7.31	3.53			Cherry 10	2	5.51	4.67	3.39
Cherry 10	3	6.85	4.25	3.7			Cherry 10	3	4.92	5.4	2.06			Cherry 10	3	4.12	3.19	2.45			Cherry 10	3	5.78865	2.27685	2.97377			Cherry 10	3	6.04	5.2	3.1			Cherry 10	3	4.99	4.92	2.93
Cherry 10	4	7.16	4.05	4.05			Cherry 10	4	4.94	4.29	2.5			Cherry 10	4	3.51	3.21	3.53			Cherry 10	4	5.7927	2.71611	3.6405			Cherry 10	4	9.01	8.87	3.36			Cherry 10	4	5.99	4.78	2.83

## Sheet: Table 3
Position	Cherry no.	ID	cell wall thickness (µm)	Zone
Pedicel region	1	1	4.39777	I
Pedicel region	1	2	4.32788	I
Pedicel region	1	1	4.46526	I
Pedicel region	1	2	4.11677	I
Pedicel region	1	1	4.74664	II
Pedicel region	1	2	3.49588	II
Pedicel region	1	3	3.75938	II
Pedicel region	1	4	2.67477	II
Pedicel region	1	1	7.01938	III
Pedicel region	1	2	6.98672	III
Pedicel region	1	3	3.89874	III
Pedicel region	1	1	4.62651	III
Pedicel region	2	1	3.2163	I
Pedicel region	2	2	2.2221	I
Pedicel region	2	3	2.91401	I
Pedicel region	2	4	3.49923	I
Pedicel region	2	1	4.59599	II
Pedicel region	2	2	4.29523	II
Pedicel region	2	1	5.45377	II
Pedicel region	2	4	5.40734	II
Pedicel region	2	1	6.20334	III
Pedicel region	2	2	6.75456	III
Pedicel region	2	1	7.71964	III
Pedicel region	2	2	4.54983	III
Pedicel region	3	1	3.44689	I
Pedicel region	3	2	3.6195	I
Pedicel region	3	1	4.80679	I
Pedicel region	3	1	3.92423	I
Pedicel region	3	1	6.66278	II
Pedicel region	3	2	4.55498	II
Pedicel region	3	1	4.36027	II
Pedicel region	3	1	3.92423	II
Pedicel region	3	1	6.14254	III
Pedicel region	3	2	5.75614	III
Pedicel region	3	3	4.36027	III
Pedicel region	3	1	5.52322	III
Pedicel region	4	1	2.91603	I
Pedicel region	4	2	4.03039	I
Pedicel region	4	3	3.94212	I
Pedicel region	4	1	4.24718	I
Pedicel region	4	1	5.3856	II
Pedicel region	4	2	3.25797	II
Pedicel region	4	7	4.3804	II
Pedicel region	4	1	3.91226	II
Pedicel region	4	1	4.38575	III
Pedicel region	4	2	3.96585	III
Pedicel region	4	1	5.16664	III
Pedicel region	4	1	5.89705	III
Pedicel region	5	1	5.51579	I
Pedicel region	5	2	4.44552	I
Pedicel region	5	3	2.46958	I
Pedicel region	5	4	3.49252	I
Pedicel region	5	1	4.45606	II
Pedicel region	5	1	4.93917	II
Pedicel region	5	2	5.41492	II
Pedicel region	5			II
Pedicel region	5	1	5.62005	III
Pedicel region	5	4	6.58754	III
Pedicel region	5	1	8.39226	III
Pedicel region	5	1	8.26056	III
Pedicel region	6	1	3.81512	I
Pedicel region	6	2	5.92087	I
Pedicel region	6	1	3.77184	I
Pedicel region	6	1	4.93204	I
Pedicel region	6	1	5.59076	II
Pedicel region	6	1	7.02689	II
Pedicel region	6	2	4.66187	II
Pedicel region	6	1	4.44552	II
Pedicel region	6	1	9.88784	III
Pedicel region	6	1	11.2849	III
Pedicel region	6	1	7.25681	III
Pedicel region	6			III
Pedicel region	7	1	5.01107	I
Pedicel region	7	1	3.5475	I
Pedicel region	7	1	4.22919	I
Pedicel region	7	2	3.39201	I
Pedicel region	7	1	2.67916	II
Pedicel region	7	1	3.26516	II
Pedicel region	7	1	3.1537	II
Pedicel region	7	1	4.2458	II
Pedicel region	7	1	4.44552	III
Pedicel region	7	1	5.07618	III
Pedicel region	7	1	4.42038	III
Pedicel region	7	1	6.82366	III
Pedicel region	8	1	4.52268	I
Pedicel region	8	1	4.52397	I
Pedicel region	8	1	4.14516	I
Pedicel region	8			I
Pedicel region	8	1	5.21634	II
Pedicel region	8	1	5.68335	II
Pedicel region	8	1	4.62651	II
Pedicel region	8	1	6.89207	II
Pedicel region	8	1	5.29002	III
Pedicel region	8			III
Pedicel region	8			III
Pedicel region	8			III
Pedicel region	9	1	4.60746	I
Pedicel region	9	1	7.43562	I
Pedicel region	9	1	7.58089	I
Pedicel region	9	1	5.01107	I
Pedicel region	9	1	3.31507	II
Pedicel region	9	1	9.29161	II
Pedicel region	9	1	8.24848	II
Pedicel region	9	1	6.33801	II
Pedicel region	9	1	6.08017	III
Pedicel region	9	1	10.7194	III
Pedicel region	9	1	9.42446	III
Pedicel region	9	1	12.4543	III
Pedicel region	10	1	3.30621	I
Pedicel region	10	2	3.05164	I
Pedicel region	10	3	3.58859	I
Pedicel region	10	4	4.00851	I
Pedicel region	10	1	3.99385	II
Pedicel region	10	2	3.05164	II
Pedicel region	10	3	3.72175	II
Pedicel region	10	1	5.04373	II
Pedicel region	10	1	6.86735	III
Pedicel region	10	2	6.19672	III
Pedicel region	10	1	5.13476	III
Pedicel region	10	2	5.23878	III
Cheek	2	1	4.07669	I
Cheek	2	2	4.24718	I
Cheek	2	3	3.90476	I
Cheek	2	4	4.59727	I
Cheek	2	1	5.67406	II
Cheek	2	2	5.92087	II
Cheek	2	1	5.61692	II
Cheek	2	2	4.58065	II
Cheek	2	1	5.9574	III
Cheek	2	2	6.24949	III
Cheek	2	3	5.61588	III
Cheek	2	1	5.5497	III
Cheek	3	1	3.05164	I
Cheek	3	2	3.21995	I
Cheek	3	3	3.06314	I
Cheek	3	4	4.03039	I
Cheek	3	1	5.04838	II
Cheek	3	4	4.38575	II
Cheek	3	1	5.50195	II
Cheek	3	2	3.72962	II
Cheek	3	1	7.94796	III
Cheek	3	2	8.67267	III
Cheek	3	1	13.0508	III
Cheek	3	2	7.78319	III
Cheek	4	1	3.88216	I
Cheek	4	2	3.01101	I
Cheek	4	3	2.76744	I
Cheek	4	4	3.81512	I
Cheek	4	1	4.48753	II
Cheek	4	2	4.35624	II
Cheek	4	1	4.88665	II
Cheek	4	1	3.92423	II
Cheek	4	1	7.81927	III
Cheek	4	4	6.58754	III
Cheek	4	1	4.29113	III
Cheek	4	2	6.02786	III
Cheek	5	4	5.22645	I
Cheek	5	1	3.82893	I
Cheek	5	4	4.31159	I
Cheek	5			I
Cheek	5	1	4.56912	II
Cheek	5	1	2.77379	II
Cheek	5	1	6.08884	II
Cheek	5	1	3.81512	II
Cheek	5	1	10.0875	III
Cheek	5	2	6.37583	III
Cheek	5	1	6.50603	III
Cheek	5	2	7.89466	III
Cheek	6	1	3.41956	I
Cheek	6	2	2.99539	I
Cheek	6	1	2.90595	I
Cheek	6	2	3.68215	I
Cheek	6	1	3.88216	II
Cheek	6	2	4.55498	II
Cheek	6	1	4.32788	II
Cheek	6	1	4.33735	II
Cheek	6	1	6.29623	III
Cheek	6	1	5.59076	III
Cheek	6	1	6.79783	III
Cheek	6	2	5.63152	III
Cheek	7	1	3.70121	I
Cheek	7	2	3.20717	I
Cheek	7	1	4.89265	I
Cheek	7	1	3.60001	I
Cheek	7	1	4.41773	II
Cheek	7	1	5.45377	II
Cheek	7	4	6.71276	II
Cheek	7	1	5.9574	II
Cheek	7	1	8.99138	III
Cheek	7	1	6.58754	III
Cheek	7	1	8.01189	III
Cheek	7	2	8.49436	III
Cheek	8	1	3.95252	I
Cheek	8	2	2.77591	I
Cheek	8	1	3.79663	I
Cheek	8	2	2.95597	I
Cheek	8	1	5.25331	II
Cheek	8	2	7.18779	II
Cheek	8	1	2.29736	II
Cheek	8	1	7.65786	II
Cheek	8	1	10.6155	III
Cheek	8	4	6.51323	III
Cheek	8	1	5.76836	III
Cheek	8	1	8.39016	III
Cheek	9	1	4.09964	I
Cheek	9	4	3.20717	I
Cheek	9	1	3.68851	I
Cheek	9	2	4.51359	I
Cheek	9	1	6.74066	II
Cheek	9	1	5.50195	II
Cheek	9	1	4.01289	II
Cheek	9	1	5.46344	II
Cheek	9	1	5.94755	III
Cheek	9	4	6.25136	III
Cheek	9	1	7.24629	III
Cheek	9	1	5.66682	III
Cheek	10	1	2.78435	I
Cheek	10	2	3.14066	I
Cheek	10	3	3.05164	I
Cheek	10	1	2.77379	I
Cheek	10	1	4.76144	II
Cheek	10	1	4.00704	II
Cheek	10	1	3.90476	II
Cheek	10	1	3.29377	II
Cheek	10	1	6.79783	III
Cheek	10	1	5.99567	III
Cheek	10	2	5.14845	III
Cheek	10	1	7.04023	III
Stylar scar	1	1	3.58532	I
Stylar scar	1	2	5.20734	I
Stylar scar	1	3	3.61464	I
Stylar scar	1	4	5.93669	I
Stylar scar	1	1	8.99464	II
Stylar scar	1	2	5.41492	II
Stylar scar	1	1	4.31159	II
Stylar scar	1	2	5.5497	II
Stylar scar	1	1	5.31104	III
Stylar scar	1	2	5.96527	III
Stylar scar	1	1	5.41601	III
Stylar scar	1	2	5.83205	III
Stylar scar	2	1	4.62651	I
Stylar scar	2	2	6.27851	I
Stylar scar	2	3	5.17232	I
Stylar scar	2	1	4.12388	I
Stylar scar	2	1	5.37689	II
Stylar scar	2	2	7.17391	II
Stylar scar	2	1	5.41601	II
Stylar scar	2	2	6.55631	II
Stylar scar	2	1	5.71525	III
Stylar scar	2	2	6.04146	III
Stylar scar	2	1	6.40794	III
Stylar scar	2	1	5.29002	III
Stylar scar	3	1	4.12104	I
Stylar scar	3	2	5.36925	I
Stylar scar	3	3	4.44552	I
Stylar scar	3	4	4.22919	I
Stylar scar	3	1	7.82302	II
Stylar scar	3	2	6.09943	II
Stylar scar	3	1	7.2171	II
Stylar scar	3	2	4.56912	II
Stylar scar	3	1	8.63201	III
Stylar scar	3	2	6.23634	III
Stylar scar	3	1	6.41434	III
Stylar scar	3	2	10.8774	III
Stylar scar	4	1	4.76144	I
Stylar scar	4	2	4.96876	I
Stylar scar	4	1	5.28004	I
Stylar scar	4	2	5.01107	I
Stylar scar	4	1	5.38016	II
Stylar scar	4	1	5.49875	II
Stylar scar	4	2	6.27944	II
Stylar scar	4	1	5.07041	II
Stylar scar	4	1	7.6525	III
Stylar scar	4	2	7.68232	III
Stylar scar	4	1	4.54596	III
Stylar scar	4	2	7.79749	III
Stylar scar	5	1	3.67896	I
Stylar scar	5	2	4.21252	I
Stylar scar	5	3	3.39892	I
Stylar scar	5	4	3.38335	I
Stylar scar	5	1	4.96876	II
Stylar scar	5	1	4.82992	II
Stylar scar	5	1	5.87313	II
Stylar scar	5	1	6.21467	II
Stylar scar	5	1	5.92483	III
Stylar scar	5	1	7.12551	III
Stylar scar	5	1	5.10039	III
Stylar scar	5	1	6.17396	III
Stylar scar	6	1	4.02894	I
Stylar scar	6	2	3.26516	I
Stylar scar	6	3	4.21808	I
Stylar scar	6	4	3.84116	I
Stylar scar	6	1	3.4247	II
Stylar scar	6	2	4.11534	II
Stylar scar	6	3	4.33329	II
Stylar scar	6	1	5.29778	II
Stylar scar	6	1	4.93204	III
Stylar scar	6	2	6.37123	III
Stylar scar	6	1	6.49791	III
Stylar scar	6	2	5.99567	III
Stylar scar	7	1	5.69983	I
Stylar scar	7	2	5.46666	I
Stylar scar	7	3	4.11534	I
Stylar scar	7	1	5.31104	I
Stylar scar	7	1	5.7653	II
Stylar scar	7	2	5.83205	II
Stylar scar	7	1	6.64956	II
Stylar scar	7	1	7.89466	II
Stylar scar	7	1	6.86479	III
Stylar scar	7	2	6.99846	III
Stylar scar	7	1	6.0975	III
Stylar scar	7	4	5.61692	III
Stylar scar	8	1	3.45538	I
Stylar scar	8	1	3.91376	I
Stylar scar	8	2	3.66459	I
Stylar scar	8	3	3.84574	I
Stylar scar	8	1	4.06949	II
Stylar scar	8	1	4.94036	II
Stylar scar	8	1	3.84116	II
Stylar scar	8	1	5.82199	II
Stylar scar	8	1	6.55631	III
Stylar scar	8	2	8.11661	III
Stylar scar	8	1	5.86114	III
Stylar scar	8	1	6.64427	III
Stylar scar	9	1	2.92606	I
Stylar scar	9	2	2.76744	I
Stylar scar	9	1	2.77379	I
Stylar scar	9	2	2.80951	I
Stylar scar	9	1	8.38457	II
Stylar scar	9	2	5.64816	II
Stylar scar	9	3	5.29002	II
Stylar scar	9	1	5.17232	II
Stylar scar	9	1	4.15081	III
Stylar scar	9	1	5.74084	III
Stylar scar	9	1	7.79824	III
Stylar scar	9	2	6.71538	III
Stylar scar	10	1	3.03429	I
Stylar scar	10	2	3.7827	I
Stylar scar	10	1	2.10278	I
Stylar scar	10	1	3.25797	I
Stylar scar	10	1	4.50449	II
Stylar scar	10	1	5.51472	II
Stylar scar	10	1	4.12388	II
Stylar scar	10	1	4.35893	II
Stylar scar	10	1	6.99846	III
Stylar scar	10	1	4.59471	III
Stylar scar	10	1	6.55631	III
Stylar scar	10	1	5.53277	III

## Sheet: Table 4
Cultivar: Regina, field Herrenhausen			11.07.2016					12.07.2016
Incubation: 20 h								Incubation: 20 h
malic acid (70 mM)								deionized water
	cell wall no.	Zone III	Zone II	Zone I	Length zone II				cell wall no.	Zone III	Zone II	Zone I	Length zone II
		µm	µm	µm	µm					µm	µm	µm	µm
Cherry 1	1	5.9	5.6	7.61	262.34			Cherry 1	1	4.25	3.8	3.46	86.38
Cherry 1	2	7.72	6.71	4.51				Cherry 1	2	4.87	3.71	3.23
Cherry 1	3	8.32	6.15	4.75				Cherry 1	3	5.14	4.54	2.58
Cherry 1	4	8.77	5.33	4.9				Cherry 1	4	6.24	3.76	2.93
Cherry 2	1	7.59	7.9	6.85	766.43			Cherry 2	1	5.46	3.24	2.26	52.79
Cherry 2	2	6.78	8.55	7.79				Cherry 2	2	4.52	3.31	2.6
Cherry 2	3	7.82	7.06	4.14				Cherry 2	3	4.69	3.71	3.82
Cherry 2	4	5.15	6.07	8.11				Cherry 2	4	4.25	3.78	3.93
Cherry 3	1	9.82	9.03	7.75	243.24			Cherry 3	1	6.74	4.29	2.6	146.35
Cherry 3	2	7.24	8.85	7.49				Cherry 3	2	6.4	5.77	3.88
Cherry 3	3	6.86	8.21	7.76				Cherry 3	3	6.4	6.3	4.56
Cherry 3	4	8.05	9.52	9.24				Cherry 3	4	6.78	4.77	3.53
Cherry 4	1	10.74	8.44	6.44	343.67			Cherry 4	1	5.5	4.76	2.98	196.69
Cherry 4	2	9.82	9.41	6.74				Cherry 4	2	7.46	7.07	2.82
Cherry 4	3	12.89	9.2	6.53				Cherry 4	3	7.79	4.24	6.31
Cherry 4	4	9.13	10.56	9.72				Cherry 4	4	8.66	5.67	6.38
Cherry 5	1	6.9	6.08	10.1	181.24			Cherry 5	1	4.36	3.93	2.85	193.45
Cherry 5	2	7.65	6.93	8.31				Cherry 5	2	4.57	3.42	2.56
Cherry 5	3	9.44	8.35	7.97				Cherry 5	3	6.1	3.76	2.82
Cherry 5	4	10.04	8.55	7.15				Cherry 5	4	5.83	3.71	2.96
Cherry 6	1	8.39	7.85	9.76	667.36			Cherry 6	1	5.46	1.86	1.43	231.96
Cherry 6	2	7.55	8.33	7.88				Cherry 6	2	7.05	5.91	2.19
Cherry 6	3	10.24	6.84	9.81				Cherry 6	3	7.72	2.13	2.47
Cherry 6	4	7.8	5.05	6.28				Cherry 6	4	7.65	3.36	2.02
Cherry 7	1	7.65	8.24	5.95	248.86			Cherry 7	1	6.17	5.32	8.06	340.69
Cherry 7	2	7.33	7.56	5.41				Cherry 7	2	6.04	6.44	6.31
Cherry 7	3	6.77	7.32	6.21				Cherry 7	3	5.02	7.34	3.72
Cherry 7	4	10.83	8.06	5.83				Cherry 7	4	5.11	4.62	3.88
Cherry 8	1	11.26	11.11	12.79	191.16			Cherry 8	1	4.78	5.38	2.49	264.11
Cherry 8	2	7.85	8.27	11.48				Cherry 8	2	6.29	5.75	2.29
Cherry 8	3	12.2	9.36	9.58				Cherry 8	3	6.54	2.31	1.7
Cherry 8	4	9.49	10.67	11.53				Cherry 8	4	5.01	3.76	2.02
Cherry 9	1	8.33	6.61	9.09	289.25			Cherry 9	1	7.61	5.16	1.78	419.21
Cherry 9	2	11.38	7.08	7.1				Cherry 9	2	5.27	6.29	2.79
Cherry 9	3	7.4	9.94	7.42				Cherry 9	3	5.06	4.11	2.68
Cherry 9	4	7.4	7.74	5.35				Cherry 9	4	5.13	3.95	2.63
Cherry 10	1	10.55	10	8.13	330.36			Cherry 10	1	6.37	5.72	3.34	294.77
Cherry 10	2	10.23	8.67	8.3				Cherry 10	2	8.03	5.06	4.05
Cherry 10	3	8.41	8.23	11.52				Cherry 10	3	6.75	4.35	3.82
Cherry 10	4	9.92	7.85	5.84				Cherry 10	4	5.69	3.73	3.29

## Sheet: Fig. 2+3
Position	Replication	Time (h)	Crack 1	Crack 2	Crack 3	Crack 4	Crack 5	Crack 6	Crack 7
Stylar scar	1	0
Stylar scar	1	2
Stylar scar	1	4	3.58
Stylar scar	1	6	8.72
Stylar scar	1	8	12.97
Stylar scar	1	10	16.49
Stylar scar	1	12	17.51
Stylar scar	1	14	18.04
Stylar scar	1	16	17.93
Stylar scar	1	18	17.98
Stylar scar	1	20	18.25
Stylar scar	1	22	18.57
		Origin	Stylar scar
Stylar scar	2	0
Stylar scar	2	2
Stylar scar	2	4	5.21	5.82	5.65
Stylar scar	2	6	5.96	8.39	9.2
Stylar scar	2	8	6.43	11.77	9.2	0.85
Stylar scar	2	10	7.79	11.69	9.34	2.65
Stylar scar	2	12	7.1	12.02	9.43	4.98
Stylar scar	2	14	7.37	12.13	9.22	4.84
Stylar scar	2	16	6.52	12.13	9.01	4.92
Stylar scar	2	18	6.55	12.02	9.05	4.98
Stylar scar	2	20	6.01	11.99	9.02	4.75
Stylar scar	2	22	5.8	11.89	9.01	4.68
		Origin	Stylar scar	Stylar scar	Stylar scar	Shoulder
Stylar scar	3	0
Stylar scar	3	2
Stylar scar	3	4
Stylar scar	3	6	5.21
Stylar scar	3	8	11.68
Stylar scar	3	10	14.64	4.46	2.01
Stylar scar	3	12	15.4	4.43	2.42
Stylar scar	3	14	15.14	4.8	2.4
Stylar scar	3	16	15.22	6.76	3.47
Stylar scar	3	18	15.24	6.98	3.89
Stylar scar	3	20	15.21	8.88	4.25
Stylar scar	3	22	15.2	9.67	4.44
		Origin	Stylar scar	Stylar scar	Suture
Stylar scar	4	0
Stylar scar	4	2
Stylar scar	4	4	9.07	6.7
Stylar scar	4	6	10.57	8.36
Stylar scar	4	8	11.21	12.02
Stylar scar	4	10	10.88	12.9
Stylar scar	4	12	11.1	12.3	1.94
Stylar scar	4	14	12.14	12.85	4.38
Stylar scar	4	16	11.88	12.23	5.03
Stylar scar	4	18	12.01	12.27	5.1
Stylar scar	4	20	12.48	12.31	5.18
Stylar scar	4	22	12.65	12.34	5.27
		Origin	Stylar scar	Stylar scar	Shoulder 1
Stylar scar	5	0
Stylar scar	5	2
Stylar scar	5	4	11.88	5.87	9.64
Stylar scar	5	6	13.02	6.38	12.88
Stylar scar	5	8	14.47	9.32	14.57
Stylar scar	5	10	14.61	9.31	14.54
Stylar scar	5	12	14.86	8.6	14.57
Stylar scar	5	14	14.24	9.26	14.32
Stylar scar	5	16	14.26	8.73	14.57
Stylar scar	5	18	14.32	8.74	14.78
Stylar scar	5	20	14.5	8.76	14.99
Stylar scar	5	22	14.74	8.77	15.13
		Origin	Stylar scar	Stylar scar	Stylar scar
Stylar scar	6	0
Stylar scar	6	2
Stylar scar	6	4	8.22
Stylar scar	6	6	11.25
Stylar scar	6	8	14.14
Stylar scar	6	10	15.76
Stylar scar	6	12	17.13	0.64
Stylar scar	6	14	18.38	1.82	2.93
Stylar scar	6	16	19.31	3.11	3.41
Stylar scar	6	18	19.35	3.3	3.44
Stylar scar	6	20	19.4	3.42	3.66
Stylar scar	6	22	19.43	3.61	3.83
		Origin	Stylar scar	Shoulder 1	Shoulder 1
Pedicel region	1	0
Pedicel region	1	2
Pedicel region	1	4
Pedicel region	1	6
Pedicel region	1	8	6.82
Pedicel region	1	10	8.8
Pedicel region	1	12	8.95
Pedicel region	1	14	8.97
Pedicel region	1	16	9.01
Pedicel region	1	18	8.78
Pedicel region	1	20	8.68
Pedicel region	1	22	9.11
		Origin	Cheek
Pedicel region	2	0
Pedicel region	2	2	3.61
Pedicel region	2	4	4.76
Pedicel region	2	6	5.06
Pedicel region	2	8	5.08
Pedicel region	2	10	5.54	4.64
Pedicel region	2	12	5.65	4.73
Pedicel region	2	14	5.72	4.85
Pedicel region	2	16	5.83	4.9
Pedicel region	2	18	5.88	4.99
Pedicel region	2	20	5.9	5.78
Pedicel region	2	22	6.2	6.93
		Origin	Cheek	Pedicel region
Pedicel region	3	0
Pedicel region	3	2
Pedicel region	3	4	2.55	5.14	1.73
Pedicel region	3	6	5.84	7.67	2.38
Pedicel region	3	8	6.8	8.6	4.14
Pedicel region	3	10	7.98	11.63	7.62
Pedicel region	3	12	8.22	11.84	7.63
Pedicel region	3	14	8.78	11.99	7.63
Pedicel region	3	16	9.13	12.05	7.68
Pedicel region	3	18	9.89	12.12	7.61
Pedicel region	3	20	10.52	12.21	7.58
Pedicel region	3	22	10.88	11.86	8.32
		Origin	Shoulder 1	Shoulder 1	Suture
Pedicel region	4	0
Pedicel region	4	2
Pedicel region	4	4	7.28
Pedicel region	4	6	7.73
Pedicel region	4	8	7.84
Pedicel region	4	10	4.48
Pedicel region	4	12	4.58
Pedicel region	4	14	4.76
Pedicel region	4	16	5.48
Pedicel region	4	18	6.78
Pedicel region	4	20	8.37
Pedicel region	4	22	8.48
		Origin	Pedicel region
Pedicel region	5	0
Pedicel region	5	2
Pedicel region	5	4	4.77
Pedicel region	5	6	4.38	9.6
Pedicel region	5	8	5.02	11.53
Pedicel region	5	10	4.56	11.62
Pedicel region	5	12	4.58	11.69
Pedicel region	5	14	4.65	11.73
Pedicel region	5	16	4.68	11.89
Pedicel region	5	18	4.74	12.23
Pedicel region	5	20	4.95	12.3
Pedicel region	5	22	4.73	12.33
		Origin	Suture	Pedicel region
Pedicel region	6	0
Pedicel region	6	2
Pedicel region	6	4	6.4	5.43	2.86
Pedicel region	6	6	6.18	6.05	3.98
Pedicel region	6	8	6.51	6.75	4.77
Pedicel region	6	10	6.35	7.39	6.36
Pedicel region	6	12	6.45	7.45	6.48
Pedicel region	6	14	6.32	7.43	7.46
Pedicel region	6	16	6.38	6.8	9.5
Pedicel region	6	18	6.45	6.2	12.23
Pedicel region	6	20	6.49	6.07	14.61
Pedicel region	6	22	7.02	6.31	14.67
		Origin	Pedicel region	Cheek	Suture
Shoulder 1	1	0
Shoulder 1	1	2
Shoulder 1	1	4	4.5471
Shoulder 1	1	6	9.76497	6.75611	4.72261	5.66614
Shoulder 1	1	8	11.8059	11.5691	6.28828	6.57912
Shoulder 1	1	10	12.2893	12.6497	8.21971	6.49487
Shoulder 1	1	12	12.6442	14.5699	8.10673	6.45099
Shoulder 1	1	14	12.5743	16.0026	9.1532	6.23857
Shoulder 1	1	16	12.7427	15.7424	8.41052	6.86459
Shoulder 1	1	18	13.0369	15.3088	9.46503	6.04627
Shoulder 1	1	20	13.3683	16.2873	10.5542	7.55997
Shoulder 1	1	22	14.2561	16.0495	9.35882	6.6701
		Origin	Pedicel region	Shoulder 2	Shoulder 2	Stylar scar
Shoulder 1	2	0
Shoulder 1	2	2
Shoulder 1	2	4	6.18007
Shoulder 1	2	6	8.32755	3.13948
Shoulder 1	2	8	9.34269	7.84299
Shoulder 1	2	10	10.1254	8.82616
Shoulder 1	2	12	10.8976	8.86767
Shoulder 1	2	14	10.7103	8.86767
Shoulder 1	2	16	11.977	8.86767
Shoulder 1	2	18	12.5727	8.86767
Shoulder 1	2	20	12.5319	8.86767
Shoulder 1	2	22	12.3108	8.86767
		Origin	Pedicel region	Pedicel region
Shoulder 1	4	0
Shoulder 1	4	2
Shoulder 1	4	4	7.68527
Shoulder 1	4	6	9.4301
Shoulder 1	4	8	10.6457
Shoulder 1	4	10	11.2206
Shoulder 1	4	12	12.7915
Shoulder 1	4	14	14.3432
Shoulder 1	4	16	16.8866
Shoulder 1	4	18	17.3988
Shoulder 1	4	20	16.6405
Shoulder 1	4	22	17.9286
		Origin	Pedicel region
Shoulder 1	5	0
Shoulder 1	5	2
Shoulder 1	5	4
Shoulder 1	5	6	7.53784	8.03469
Shoulder 1	5	8	8.05837	8.71415
Shoulder 1	5	10	10.212	9.93936	4.56773
Shoulder 1	5	12	13.7112	11.3342	8.70503
Shoulder 1	5	14	16.5896	14.3551	9.4194
Shoulder 1	5	16	17.6236	14.9625	13.8037
Shoulder 1	5	18	16.5376	19.2287	14.1412
Shoulder 1	5	20	16.7578	21.7413	15.2203
Shoulder 1	5	22	15.6021	22.4838	17.2714
		Origin	Shoulder 1	Shoulder 1	Shoulder 1
Shoulder 1	6	0
Shoulder 1	6	2
Shoulder 1	6	4	24.2354
Shoulder 1	6	6	28.4273	4.30194	6.11662
Shoulder 1	6	8	28.335	6.49264	10.0001
Shoulder 1	6	10	29.1917	6.78662	9.62145
Shoulder 1	6	12	28.5162	6.55246	10.4808
Shoulder 1	6	14	28.4575	7.28234	10.3817
Shoulder 1	6	16	29.129	7.4341	11.4197
Shoulder 1	6	18	29.4813	6.85385	11.2231
Shoulder 1	6	20	28.5846	6.81258	11.1856
Shoulder 1	6	22	28.7706	5.91762	10.9172
		Origin	Shoulder 1	Shoulder 1	Shoulder 1
Shoulder 2	1	0
Shoulder 2	1	2
Shoulder 2	1	4
Shoulder 2	1	6
Shoulder 2	1	8
Shoulder 2	1	10
Shoulder 2	1	12
Shoulder 2	1	14
Shoulder 2	1	16
Shoulder 2	1	18	6.24
Shoulder 2	1	20	7.82
Shoulder 2	1	22	8.84
		Origin	Pedicel region
Shoulder 2	2	0
Shoulder 2	2	2
Shoulder 2	2	4
Shoulder 2	2	6	5.29
Shoulder 2	2	8	7.96	6.54
Shoulder 2	2	10	10.2	11
Shoulder 2	2	12	11.14	13.43
Shoulder 2	2	14	11.52	15.06
Shoulder 2	2	16	11.82	15.14
Shoulder 2	2	18	13.17	15.7
Shoulder 2	2	20	13.13	15.97
Shoulder 2	2	22	12.71	16.95
		Origin	Pedicel region	Shoulder 2
Shoulder 2	3	0
Shoulder 2	3	2	3.32
Shoulder 2	3	4	7.3
Shoulder 2	3	6	11.31
Shoulder 2	3	8	15.02
Shoulder 2	3	10	15.67
Shoulder 2	3	12	16.14
Shoulder 2	3	14	16.33
Shoulder 2	3	16	16.89
Shoulder 2	3	18	16.91
Shoulder 2	3	20	17.09
Shoulder 2	3	22	17.36
		Origin	Pedicel region
Shoulder 2	4	0
Shoulder 2	4	2
Shoulder 2	4	4
Shoulder 2	4	6	1.34	9.6	3.71	4.52
Shoulder 2	4	8	2.47	16.96	4.02	5.69
Shoulder 2	4	10	2.71	18.28	3.68	7
Shoulder 2	4	12	3.18	19.7	3.63	7.33
Shoulder 2	4	14	3.2	20.62	4	7.31
Shoulder 2	4	16	3.29	21.09	4.52	6.75
Shoulder 2	4	18	3.3	21.05	6.09	5.51
Shoulder 2	4	20	3.62	21.1	5.44	4.76
Shoulder 2	4	22	3.16	21.26	6.6	4.88
		Origin	Pedicel region	Shoulder 2	Shoulder 2	Shoulder 2
Shoulder 2	5	0
Shoulder 2	5	2
Shoulder 2	5	4
Shoulder 2	5	6
Shoulder 2	5	8	0.4
Shoulder 2	5	10	3.83
Shoulder 2	5	12	7.16
Shoulder 2	5	14	8.98
Shoulder 2	5	16	12.75
Shoulder 2	5	18	15.58
Shoulder 2	5	20	16.78
Shoulder 2	5	22	16.1
		Origin	Pedicel region
Shoulder 2	6	0
Shoulder 2	6	2
Shoulder 2	6	4	8.39	9.57	5.1
Shoulder 2	6	6	13.1	13.11	10.23
Shoulder 2	6	8	15.23	14.81	11.1
Shoulder 2	6	10	17.54	15.04	12.84
Shoulder 2	6	12	17	15.09	12.49
Shoulder 2	6	14	17.35	14.93	12.67
Shoulder 2	6	16	17.31	15.05	12.85
Shoulder 2	6	18	17.77	14.72	12.96
Shoulder 2	6	20	16.94	15.38	12.76
Shoulder 2	6	22	17.29	16.01	13.23
		Origin	Pedicel region	Pedicel region	Stylar scar
Suture	1	0
Suture	1	2	2.52
Suture	1	4	8.11
Suture	1	6	11.75	2.14
Suture	1	8	15.09	5.85
Suture	1	10	17.17	10.7
Suture	1	12	18.49	13.25	4.69	4.2
Suture	1	14	20.43	13.72	4.82	6.45
Suture	1	16	21.79	14.05	4.59	8.03
Suture	1	18	21.79	14.49	4.92	7.77
Suture	1	20	21.79	14.46	5.2	8.35
Suture	1	22	21.79	14.7	5.91	8.88
		Origin	Pedicel region	Suture	Suture	Suture
Suture	2	0
Suture	2	2
Suture	2	4
Suture	2	6	1.84
Suture	2	8	4.27	2.45	3.7
Suture	2	10	5.08	3.08	8.41
Suture	2	12	6.86	3.43	10.99
Suture	2	14	7.94	3.18	13.2
Suture	2	16	9.4	3.49	14.73
Suture	2	18	10.85	3.72	17.65
Suture	2	20	14.08	3.18	17.66
Suture	2	22	16.17	3.71	18.16
		Origin	Suture	Suture	Suture
Suture	3	0
Suture	3	2	1.96
Suture	3	4	12.59	3.02	8.55
Suture	3	6	14.22	3.73	9.22
Suture	3	8		3.8		21.57
Suture	3	10		3.64		21.09
Suture	3	12		3.56		21.84	4.08	3.21
Suture	3	14		3.77		22.57	5.22	3.17
Suture	3	16		3.96		23.05	5.3	3.72
Suture	3	18		3.83		22.89	5.8	4.55
Suture	3	20		4.34		23.28	5.75	4.6
Suture	3	22		4.52		23.41	6.23	6.35
		Origin	Suture	Suture	Suture	Cominbation 1+3	Suture	Suture
Suture	4	0
Suture	4	2	3.08	1.82
Suture	4	4	7.19	9.14	5.95	3.82
Suture	4	6	7.79	10.29	5.53	6.37
Suture	4	8	8.21	10.98	6.26	7.01
Suture	4	10	8.71	13.03	5.88	6.99
Suture	4	12	10.92	14.41	6.23	6.9
Suture	4	14	13.93	16.57	5.77	7.24
Suture	4	16	13.92	18.12	6.68	7.25
Suture	4	18	13.63	18.62	6.44	7.27
Suture	4	20	13.75	18.96	6.82	7.66
Suture	4	22	13.81	18.78	6.64	6.75
		Origin	Suture	Suture	Pedicel region	Suture
Suture	5	0
Suture	5	2
Suture	5	4	3.78	8.82
Suture	5	6	12.14	10.74
Suture	5	8	14.76	11.48
Suture	5	10	18.23	11.65	1.88
Suture	5	12	18.78	11.63	4.2
Suture	5	14	19.84	11.54	5.83
Suture	5	16	19.84	11.84	6.89
Suture	5	18	19.84	11.96	7.75
Suture	5	20	19.84	11.77	8.39
Suture	5	22	19.84	12.22	9.18
		Origin	Suture	Suture	Suture
Suture	6	0
Suture	6	2
Suture	6	4	3.79	13.39	5.23
Suture	6	6	4.93	15.1	7.24
Suture	6	8	5.07	15.51	7.54
Suture	6	10	5.46	16.09	8.09
Suture	6	12	5.14	15.97	8.33
Suture	6	14	5.57	14.97	7.94
Suture	6	16	5.32	15.55	8.41
Suture	6	18	5.74	16.28	8.27
Suture	6	20	5.32	16.4	8.19
Suture	6	22	5.75	15.42	7.96
		Origin	Suture	Suture	Suture
Cheek	1	0
Cheek	1	2	11.71
Cheek	1	4	17.6
Cheek	1	6	21.21
Cheek	1	8	23.82
Cheek	1	10	24.47
Cheek	1	12	24.47
Cheek	1	14	24.47
Cheek	1	16	24.47
Cheek	1	18	24.47
Cheek	1	20	24.47
Cheek	1	22	24.47
		Origin	Pedicel region
Cheek	2	0
Cheek	2	2	3.57	1.76
Cheek	2	4	14.92	8.92
Cheek	2	6	15.68	8.81
Cheek	2	8	15.83	8.68
Cheek	2	10	15.51	8.84
Cheek	2	12	15.74	8.48
Cheek	2	14	15.91	8.72
Cheek	2	16	15.97	8.66
Cheek	2	18			27.45
Cheek	2	20			27.45
Cheek	2	22			27.45
		Origin	Cheek	Cheek	Combination 1+2
Cheek	3	0
Cheek	3	2
Cheek	3	4
Cheek	3	6
Cheek	3	8
Cheek	3	10
Cheek	3	12	0.48
Cheek	3	14	3.18
Cheek	3	16	5.13
Cheek	3	18	6.39
Cheek	3	20	8
Cheek	3	22	9.05
		Origin	Shoulder 1
Cheek	4	0
Cheek	4	2
Cheek	4	4	2.3	3.09	8.41	3.28	1.62
Cheek	4	6	3.51	4.37	10.33	4.82	1.56
Cheek	4	8	4.76	5.95			2.26	13.08
Cheek	4	10	5.01	6.67					17.83
Cheek	4	12	4.59	6.95					17.66
Cheek	4	14	4.89	8.63					19.03
Cheek	4	16	5.54	8.28					18.06
Cheek	4	18	5.03	10.35					19.85
Cheek	4	20	5	12.61					19.4
Cheek	4	22	5.18	13.4					20.12
		Origin	Pedicel region	Cheek	Cheek	Cheek	Cheek	Combination 3+4	Combination 3+4+5
Cheek	5	0
Cheek	5	2
Cheek	5	4
Cheek	5	6	1.25	4.42	6.56	2.61
Cheek	5	8	5.98	5.53	7.73	3.86
Cheek	5	10	7.7	6.24	11.44	3.83
Cheek	5	12	8.77	6.42	11.91	4.15
Cheek	5	14	10.32	6.18	13.16	4.08
Cheek	5	16	10.87	7.01	13.97	3.72
Cheek	5	18	10.7	6.39	14.41	4.67
Cheek	5	20	9.89	7.01	14.84	4.84
Cheek	5	22	11.68	7.86	14.89	4.84
		Origin	Shoulder 1	Cheek	Cheek	Stylar scar
Cheek	6	0
Cheek	6	2
Cheek	6	4
Cheek	6	6
Cheek	6	8	1.16
Cheek	6	10	2.2
Cheek	6	12	3.55
Cheek	6	14	5.18
Cheek	6	16	6.76
Cheek	6	18	9.35
Cheek	6	20	9.48
Cheek	6	22	10.95
		Origin	Stylar scar
Fig. 3B
Time (min)	Crack Nr.	Crack length (mm)
0	1	0
10	1	2.45
20	1	3.68
30	1	4.05
40	1	4.5
50	1	5.19
60	1	5.49
70	1	5.78
80	1	5.87
90	1	6.52
100	1	6.56
110	1	6.71
120	1	6.87
0	2	0
10	2	1.43
20	2	3.86
30	2	4.14
40	2	4.68
50	2	5.56
60	2	6.43
70	2	7.39
80	2	7.63
90	2	8
100	2	8.49
110	2	9.72
120	2	9.98
0	3	0
10	3	1.44
20	3	1.82
30	3	2.19
40	3	4.24
50	3	5.88
60	3	8.17
70	3	9.31
80	3	10.67
90	3	11.41
100	3	12.85
110	3	13.07
120	3	13.22
0	4	0
10	4	2.68
20	4	3.9
30	4	4.65
40	4	5.06
50	4	6.08
60	4	7.92
70	4	9.42
80	4	9.98
90	4	10.22
100	4	10.7
110	4	11.65
120	4	11.85
0	5	0
10	5	2.97
20	5	3.54
30	5	3.62
40	5	3.82
50	5	4.17
60	5	4.3
70	5	4.41
80	5	4.91
90	5	5.18
100	5	5.5
110	5	5.63
120	5	5.86
0	6	0
10	6	0.43
20	6	0.73
30	6	1.05
40	6	1.62
50	6	1.93
60	6	2.23
70	6	2.38
80	6	2.7
90	6	3.32
100	6	3.69
110	6	3.77
120	6	4.03
0	7	0
10	7	1.45
20	7	3.56
30	7	3.99
40	7	4.26
50	7	4.54
60	7	4.74
70	7	4.85
80	7	5.12
90	7	5.27
100	7	5.5
110	7	5.68
120	7	5.88
0	8	0
10	8	1.82
20	8	2.15
30	8	2.43
40	8	4.63
50	8	4.96
60	8	5.73
70	8	6.01
80	8	6.23
90	8	6.4
100	8	7.64
110	8	8.26
120	8	9.23
0	9	0
10	9	2.82
20	9	3.13
30	9	5.64
40	9	6.9
50	9	7.18
60	9	7.54
70	9	8.18
80	9	8.89
90	9	9.59
100	9	9.74
110	9	9.85
120	9	10.28
0	10	0
10	10	1.86
20	10	2.77
30	10	3.02
40	10	4.5
50	10	4.63
60	10	4.89
70	10	5.11
80	10	5.79
90	10	5.99
100	10	6.27
110	10	6.53
120	10	7.06
0	11	0
10	11	0.67
20	11	1.1
30	11	2.31
40	11	3.16
50	11	4.41
60	11	5.68
70	11	6.34
80	11	6.55
90	11	7.46
100	11	8.29
110	11	8.59
120	11	8.79
0	12	0
10	12	2.19
20	12	3.05
30	12	4.2
40	12	4.57
50	12	4.85
60	12	5.81
70	12	6.1
80	12	6.73
90	12	6.98
100	12	7.24
110	12	7.58
120	12	7.99
0	13	0
10	13	1.18
20	13	1.8
30	13	2.5
40	13	2.82
50	13	3.12
60	13	3.62
70	13	4.48
80	13	4.93
90	13	5.91
100	13	6.15
110	13	6.36
120	13	6.47

## Sheet: Fig. 5a
Regina	6 h incubation								0 h incubation							30 h incubation							50 h incubation							74 h incubation							16 h incubation
2016-07-18								2016-07-19							2016-07-19							2016-07-20							2016-07-21							2016-07-21
Ruthe, field								Ruthe, field							Ruthe, field							Ruthe, field							Ruthe, field							Ruthe, field
	cell wall no.	Zone III	Zone II	Zone I	Length zone II				cell wall no.	Zone III	Zone II	Zone I	Length zone II			cell wall no.	Zone III	Zone II	Zone I	Length zone II			cell wall no.	Zone III	Zone II	Zone I	Length zone II			cell wall no.	Zone III	Zone II	Zone I	Length zone II			cell wall no.	Zone III	Zone II	Zone I	Length zone II
		µm	µm	µm	µm					µm	µm	µm	µm				µm	µm	µm	µm				µm	µm	µm	µm				µm	µm	µm	µm				µm	µm	µm	µm
Cherry 1	1	4.6	2.62	2.42	158.25			Cherry 1	1			2.5			Cherry 1	1	4.04	2.85	2.97	200.94		Cherry 1	1	7.37	11.09	5.97	289.23		Cherry 1	1	10.04	7.39	8.73	160.23		Cherry 1	1	7.27	3.25	3.71	835.3
Cherry 1	2	6.94	2.42	2.47				Cherry 1	2			3.17			Cherry 1	2	5.44	3.51	2.62			Cherry 1	2	5.24	6.94	7.88			Cherry 1	2	6.31	8.51	8.15			Cherry 1	2	6.24	4.08	4.15
Cherry 1	3	6.13	2.15	3.31				Cherry 1	3			2.59			Cherry 1	3	5.3	4.03	1.82			Cherry 1	3	7.29	9.05	6.72			Cherry 1	3	6.5	7.79	8.21			Cherry 1	3	9.29	2.41	3.33
Cherry 1	4	6.77	2.35	1.74				Cherry 1	4			2.05			Cherry 1	4	4.78	4.63	2.1			Cherry 1	4	9	4.4	5.52			Cherry 1	4	5.51	6.2	6.53			Cherry 1	4	7.74	4.51	4.4
Cherry 2	1	9.02	4.04	2.52	575.32			Cherry 2	1			2.13			Cherry 2	1	5.59	4.33	2.91	249.87		Cherry 2	1	6.64	5.97	4.42	315.98		Cherry 2	1	7.98	8.63	6.42	348.03		Cherry 2	1	6.19	4.27	3.02	524.21
Cherry 2	2	6.71	3.08	2.57				Cherry 2	2			2.2			Cherry 2	2	5.55	6.2	2.93			Cherry 2	2	6.36	5.78	4.49			Cherry 2	2	6.43	6.9	7.68			Cherry 2	2	5.2	4.08	4
Cherry 2	3	8.44	4.32	3.1				Cherry 2	3			1.81			Cherry 2	3	5.34	3.96	2.42			Cherry 2	3	9.04	5.62	4.94			Cherry 2	3	8.19	7.09	6.39			Cherry 2	3	3.96	5.44	2.75
Cherry 2	4	8.96	2.67	3.32				Cherry 2	4			2.74			Cherry 2	4	4.42	3.8	2.53			Cherry 2	4	6.04	8.15	6.23			Cherry 2	4	7.53	6.42	8.08			Cherry 2	4	4.48	5.66	3.49
Cherry 3	1	5.7	2.68	2.31	220.29			Cherry 3	1			2.57			Cherry 3	1	6.66	2.91	2.19	250.22		Cherry 3	1	9.82	6.61	5.53	158.78		Cherry 3	1	9.21	6.35	5.3	194.05		Cherry 3	1	6.39	5.47	3.72	788.36
Cherry 3	2	5.94	3.1	3.25				Cherry 3	2			3.31			Cherry 3	2	4.44	3.87	2.06			Cherry 3	2	6.06	7.11	4.33			Cherry 3	2	7.97	6.46	4.54			Cherry 3	2	4.34	4.28	3.13
Cherry 3	3	5.6	2.35	1.63				Cherry 3	3			2.76			Cherry 3	3	4.18	4.54	2.13			Cherry 3	3	8.81	7.83	4.6			Cherry 3	3	7.25	7.43	5.96			Cherry 3	3	6.1	3.22	3.71
Cherry 3	4	5.42	2.5	3.73				Cherry 3	4			2.61			Cherry 3	4	4.54	3.31	2.13			Cherry 3	4	7.31	7.58	4.87			Cherry 3	4	7.33	5.07	5.07			Cherry 3	4	5.17	4.62	3.6
Cherry 4	1	8.91	2.06	3	216.77			Cherry 4	1			2.75			Cherry 4	1	4.26	2.71	3.66	273.62		Cherry 4	1	7.78	5.07	3.55	570.66		Cherry 4	1	5.72	6.23	7.52	266.64		Cherry 4	1	6.34	3.21	1.68	248.73
Cherry 4	2	8.24	2.84	2.78				Cherry 4	2			2.84			Cherry 4	2	5.64	5	3.8			Cherry 4	2	6.79	4.69	4.67			Cherry 4	2	5.92	5.64	6.96			Cherry 4	2	6.66	3.37	3.34
Cherry 4	3	5.12	2.72	2.6				Cherry 4	3			2.02			Cherry 4	3	5.48	3.09	2.39			Cherry 4	3	6.37	6.04	3.64			Cherry 4	3	6.77	5.98	6.46			Cherry 4	3	5.48	5.5	2.3
Cherry 4	4	9.28	2.4	2.32				Cherry 4	4			2.63			Cherry 4	4	6.39	3.02	3.51			Cherry 4	4	5.5	5.08	3.13			Cherry 4	4	6.15	7.69	7.64			Cherry 4	4	2.12	4.38	2.62
Cherry 5	1	2.1	1.55	1.88	327.9			Cherry 5	1			2.02			Cherry 5	1	4.99	2.92	2.29	834.6		Cherry 5	1	6.17	6	4.95	324.68		Cherry 5	1	6.21	7.32	5.65	121.99		Cherry 5	1	5.5	2.93	2.08	226.39
Cherry 5	2	2.26	1.57	2.1				Cherry 5	2			1.43			Cherry 5	2	5.18	3.58	4.53			Cherry 5	2	7.19	5.96	5.08			Cherry 5	2	5.38	7.2	6.63			Cherry 5	2	6.98	3.51	2.65
Cherry 5	3	2.19	2.24	2.6				Cherry 5	3			1.81			Cherry 5	3	5.97	4.41	3.28			Cherry 5	3	8.02	5.96	3.9			Cherry 5	3	6.36	5.35	5.01			Cherry 5	3	6.71	3.96	2.45
Cherry 5	4	2.34	2.26	2.33				Cherry 5	4			2.1			Cherry 5	4	5.59	4.77	1.88			Cherry 5	4	8.02	5.44	5.09			Cherry 5	4	6.56	5.09	6.02			Cherry 5	4	5.37	2.9	2.42
Cherry 6	1	3.06	1.91	2.02	488.61			Cherry 6	1			2.15			Cherry 6	1	6.4	5.78	3.07	265.03		Cherry 6	1	6.19	5.4	5.96	135.05		Cherry 6	1	8.86	5.81	8.53	300.53		Cherry 6	1	5.72	3.03	2.31	242.52
Cherry 6	2	2.73	2.65	1.44				Cherry 6	2			2.1			Cherry 6	2	5.85	4.08	2.39			Cherry 6	2	10.15	6.06	8.18			Cherry 6	2	6.38	8.12	5.81			Cherry 6	2	7.41	3.44	2.49
Cherry 6	3	5.1	2.24	1.94				Cherry 6	3			1.59			Cherry 6	3	6.84	3.02	2.46			Cherry 6	3	10.14	6.92	4.7			Cherry 6	3	9.67	7.9	6.49			Cherry 6	3	6.5	3.48	2.24
Cherry 6	4	4.85	1.81	2.03				Cherry 6	4			2.02			Cherry 6	4	5.23	2.96	2.71			Cherry 6	4	6.55	5.48	4.51			Cherry 6	4	4.59	6.7	5.52			Cherry 6	4	6.04	4.33	2.75
Cherry 7	1	2.45	3.02	3.02	488.61			Cherry 7	1			2.98			Cherry 7	1	7.26	4.44	3.34	248.58		Cherry 7	1	5.71	7.26	6.53	186.21		Cherry 7	1	6.1	10.02	6.62	210.38		Cherry 7	1	5.13	2.88	1.99	433.41
Cherry 7	2	2.82	2.42	2.76				Cherry 7	2			2.19			Cherry 7	2	6.32	3.96	3.19			Cherry 7	2	5.79	5.33	5.08			Cherry 7	2	7.21	7.53	6.11			Cherry 7	2	5.76	5.66	1.73
Cherry 7	3	4.47	2.98	3.14				Cherry 7	3			1.6			Cherry 7	3	7.06	2.91	2.89			Cherry 7	3	4.7	5.8	6.81			Cherry 7	3	4.94	7.62	6.55			Cherry 7	3	4.47	2.16	1.73
Cherry 7	4	2.57	2.7	2.33				Cherry 7	4			2.35			Cherry 7	4	8.04	3.7	2.89			Cherry 7	4	5.09	3.88	5.88			Cherry 7	4	7.59	7.59	6.61			Cherry 7	4	2.79	2.35	1.99
Cherry 8	1	4.94	2.96	1.52	343.7			Cherry 8	1			2.68			Cherry 8	1	6.71	5.41	4	311.03		Cherry 8	1	7.95	6.88	3.02	489.99		Cherry 8	1	6.87	6.26	5.72	367.29		Cherry 8	1	5.07	2.96	2.38	459.73
Cherry 8	2	5.28	2.1	2.1				Cherry 8	2			2.24			Cherry 8	2	6.28	3.38	2.61			Cherry 8	2	8.18	5.88	3.7			Cherry 8	2	7.18	5.42	6.45			Cherry 8	2	7.63	3.17	2
Cherry 8	3	6.17	2.02	2.5				Cherry 8	3			2.06			Cherry 8	3	5.08	6.16	2.02			Cherry 8	3	9.45	6.59	3.76			Cherry 8	3	7.16	6.82	7.87			Cherry 8	3	6.61	3.08	2.24
Cherry 8	4	5.19	1.86	1.86				Cherry 8	4			2.61			Cherry 8	4	6.31	3.05	3.29			Cherry 8	4	8.45	7.59	7.12			Cherry 8	4	7.37	5.53	6.28			Cherry 8	4	6.3	3.45	2.06
Cherry 9	1	1.96	2.45	3.32	453.12			Cherry 9	1			2.62			Cherry 9	1	7.72	3.39	2.71	316.13		Cherry 9	1	8.12	5.24	3.08	378.12		Cherry 9	1	6.87	6.26	5.72	333.66		Cherry 9	1	6.12	2.17	3.43	754.46
Cherry 9	2	3.32	2.71	1.99				Cherry 9	2			2.28			Cherry 9	2	5.46	3.27	2.58			Cherry 9	2	6.99	4.53	2.82			Cherry 9	2	7.18	5.42	6.45			Cherry 9	2	6	3.07	2.34
Cherry 9	3	3.32	3.11	3.57				Cherry 9	3			2.31			Cherry 9	3	5.57	3.83	2.31			Cherry 9	3	6.78	4.34	2.93			Cherry 9	3	7.16	6.82	7.87			Cherry 9	3	5.45	2.34	2.94
Cherry 9	4	4.19	2.68	4.33				Cherry 9	4			2.31			Cherry 9	4	6.05	3.14	2.18			Cherry 9	4	7.39	4.81	2.71			Cherry 9	4	7.37	5.53	6.28			Cherry 9	4	5.54	3.03	2.62
Cherry 10	1	2.03	3.03	1.82	363.9			Cherry 10	1			2.65			Cherry 10	1	5.33	3.17	3.14	215.96		Cherry 10	1	5.89	3.93	3.28	217.31		Cherry 10	1	8.92	6.57	6.54	342.62		Cherry 10	1	4.29	3.51	2.34
Cherry 10	2	1.92	1.88	2.04				Cherry 10	2			2.49			Cherry 10	2	5.68	2.93	2.23			Cherry 10	2	6.43	4.13	4.36			Cherry 10	2	6.14	7.34	6.23			Cherry 10	2	4.59	2.21	2.82
Cherry 10	3	1.9	2.91	2.17				Cherry 10	3			2.43			Cherry 10	3	7.52	4.54	3.4			Cherry 10	3	5.01	7.26	3.32			Cherry 10	3	10.05	7.01	7.08			Cherry 10	3	5.12	2.9	2.02
Cherry 10	4	1.9	2.09	2.07				Cherry 10	4			2.89			Cherry 10	4	5.81	3.22	2.52			Cherry 10	4	5.21	5.19	3.99			Cherry 10	4	7.35	5.47	6.61			Cherry 10	4	3.82	2.53	2

## Sheet: Fig. 5b
	6 h					16 h					30 h					50 h					74 h
	living					living					living					living					living
Replication	Zone A	Zone B	Zone C		Replication	Zone A	Zone B	Zone C		Replication	Zone A	Zone B	Zone C		Replication	Zone A	Zone B	Zone C		Replication	Zone A	Zone B	Zone C
1	6	6	1		1	4	2	2		1	6	4	3		1	0	0	0		1	0	0	0	0
2	4	2	0		2	6	4	2		2	6	4	1		2	0	0	0		2	0	0	0	0
3	6	4	0		3	5	4	2		3	6	3	1		3	2	0	0		3	1	0	0	0
4	6	3	1		4	5	4	0		4	5	2	0		4	4	2	1		4	0	0	0	0
5	6	5	4		5	6	4	2		5	4	0	0		5	3	0	0		5	0	0	0	0
6	6	3	3		6	3	2	0		6	6	5	4		6	0	0	0		6	0	0	0	0
7	6	4	2		7	6	3	2		7	4	3	1		7	0	0	0		7	0	0	0	0
8	6	4	2		8	6	3	1		8	4	2	0		8	4	2	1		8	0	0	0	0
9	4	2	2		9	5	2	0		9	5	3	2		9	6	3	0		9	2	1	0	0
10	6	4	3		10	6	2	1		10	4	3	1		10	3	1	1		10	0	0	0	0
